# Supplementary material for: How oxidized EGCG remodels α-synuclein fibrils into non-toxic aggregates: insights from computational simulations
Source: Royal Society of Chemistry journal article supplement (doi:10.1039/d3cp02261g), 2023-01-01
Supplement: d3cp02261g1.pdf [file d3cp02261g1.pdf]

## How oxidized EGCG remodels $\alpha$ -synuclein fibrils into non-toxic aggregates: insights from computational simulations

Priscila Baltazar Gonçalves, Fernando L. Palhano, Yraima Cordeiro and Ana Carolina Rennó Sodero

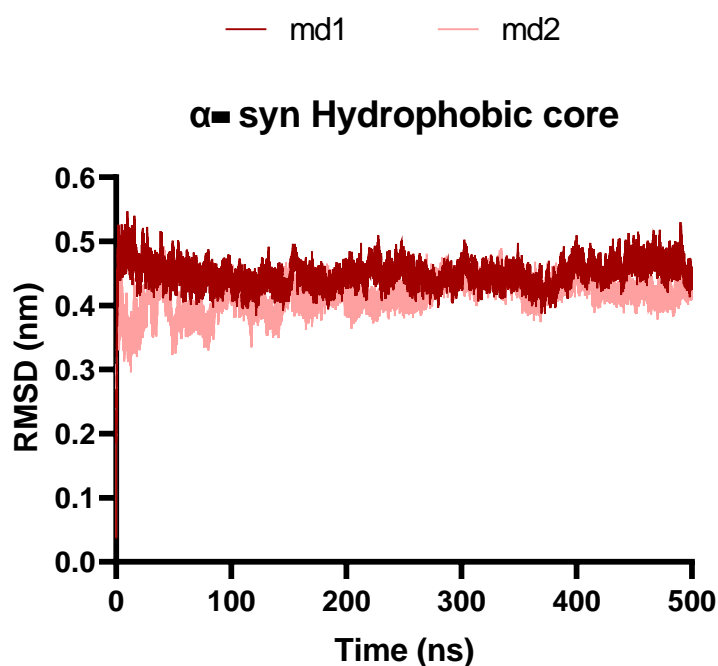

Figure S1. Backbone RMSD values of  $\alpha$ -syn hydrophobic core in the two independent replicas as a function of simulation time

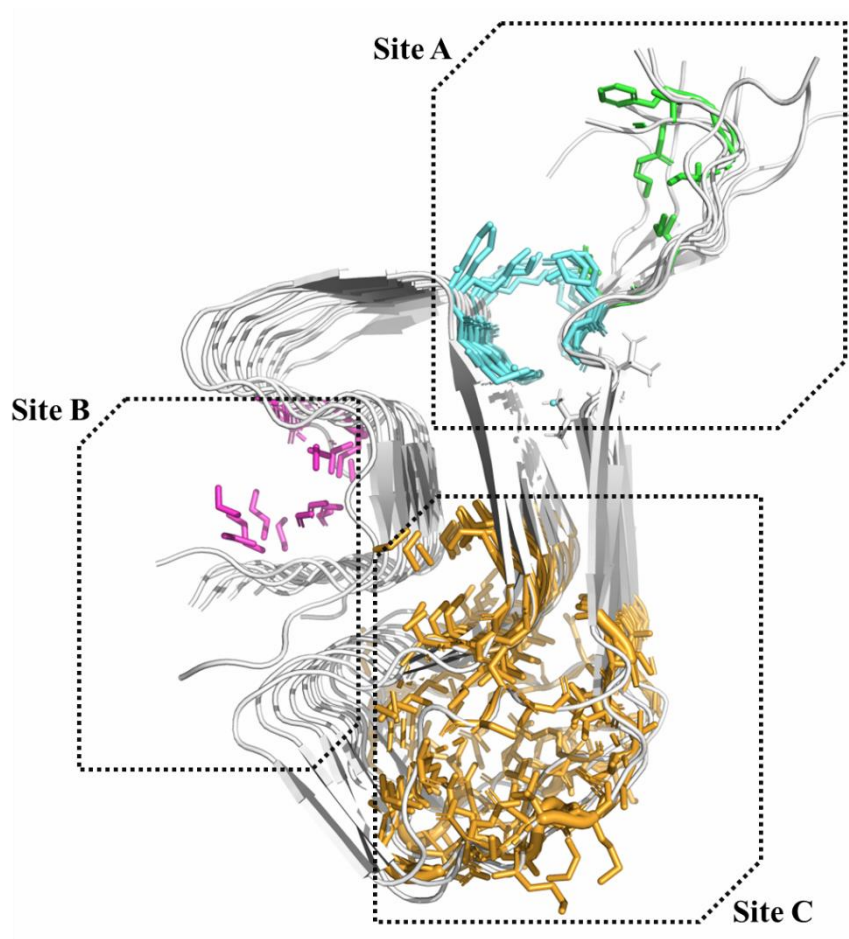

| Main Residues                                                              |                                      |                                                                                                                                                            |
|----------------------------------------------------------------------------|--------------------------------------|------------------------------------------------------------------------------------------------------------------------------------------------------------|
| Site A                                                                     | Site B                               | Site C                                                                                                                                                     |
| TYR39, VAL40, SER42, THR44,<br>LYS45, GLU46, GLY47, ALA78,<br>GLN79, LYS80 | GLY86, SER87, ILE88, PHE94,<br>LYS96 | ALA53, THR54, VAL55, ALA56, GLU57,<br>LYS58, THR59, LYS60, GLU61, GLN62, VAL63,<br>THR64, ASN65, VAL66, VAL70, VAL71,<br>THR72, GLY73, VAL74, THR75, THR92 |

Figure S2. Lys-rich sites found within the hydrophobic core of  $\alpha$ -syn fibril. Main residues from each site shown in sticks colored in green and cyan (Site A), magenta (Site B), and orange (Site C).

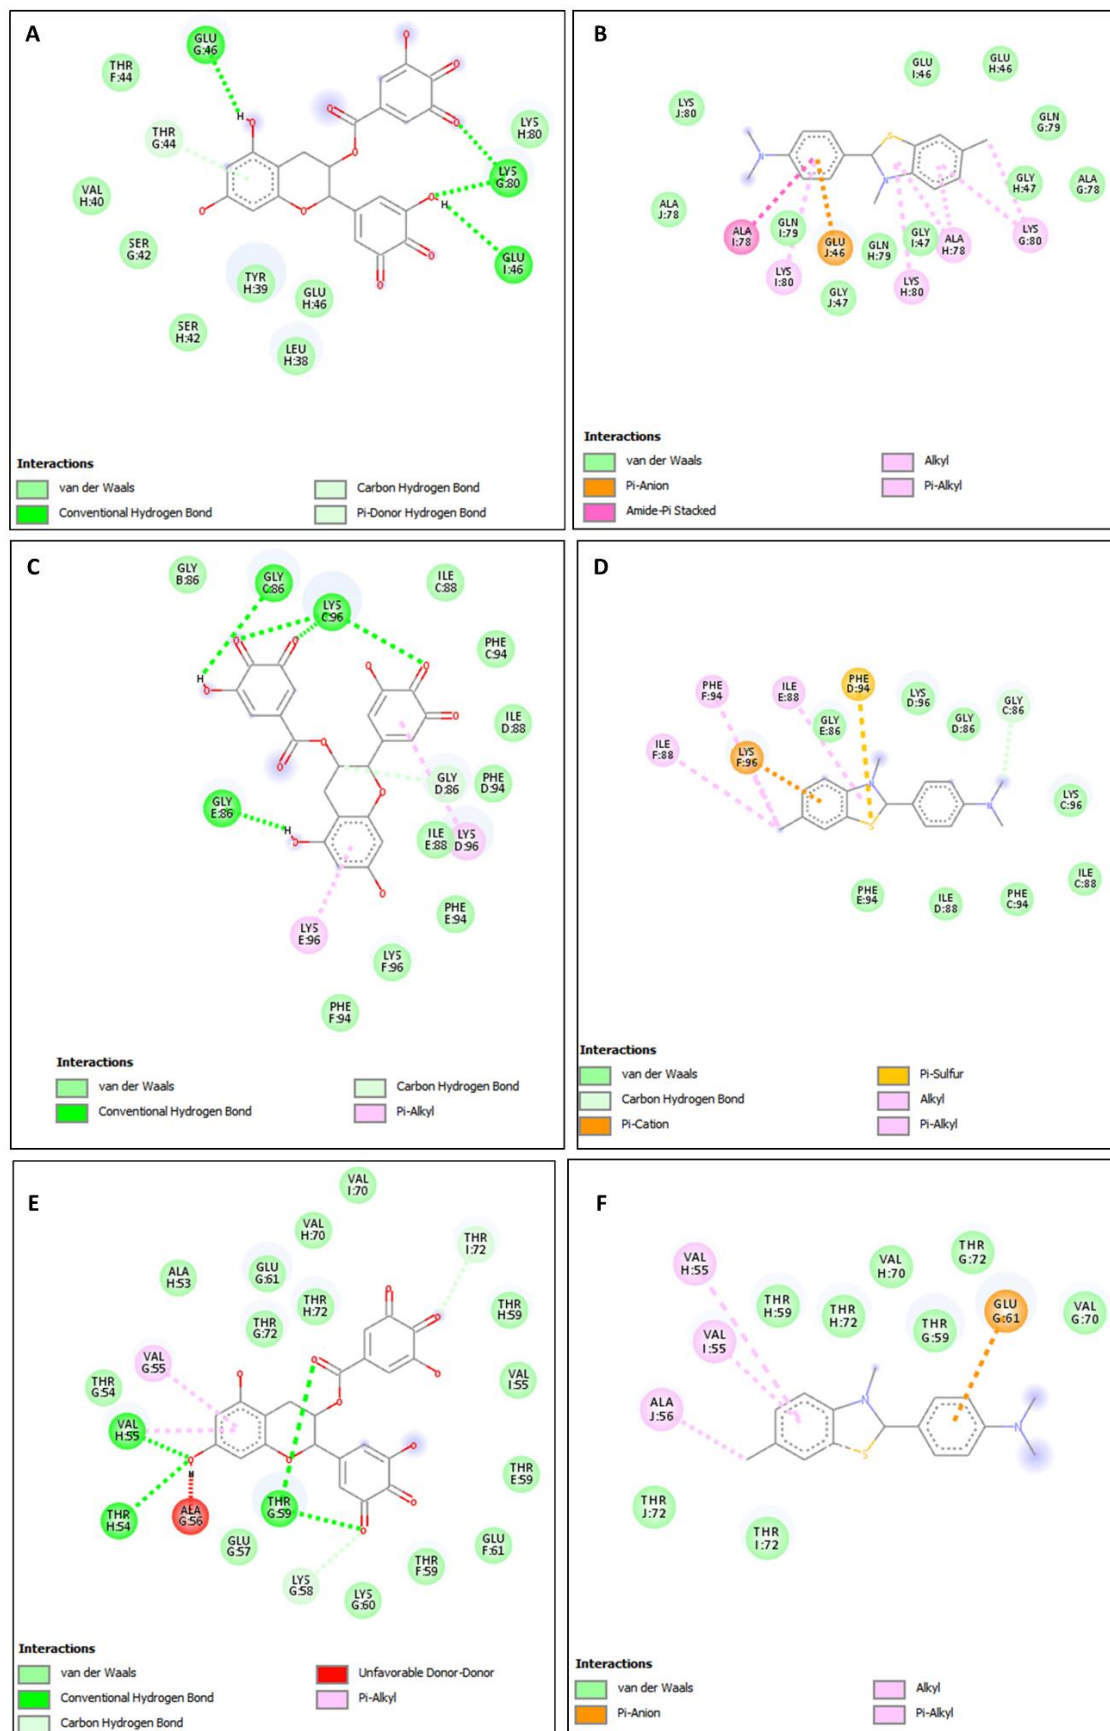

Figure S3. 2D ligand interaction diagrams of oxidized EGCG, (left) and ThT (right) bound in site A (A, B), in site B (C, D), and site C (D, E).

Table S1. Average values of backbone RMSD, SASA, and RG from MD trajectories for two replicas of each system.

| <i>Parameters</i>              | <i>Altered <math>\alpha</math>-syn</i> |        | <i>Sites</i> | <i>with EGCG</i> |        | <i>with ThT</i> |        |
|--------------------------------|----------------------------------------|--------|--------------|------------------|--------|-----------------|--------|
|                                | md1                                    | md2    |              | md1              | md2    | md1             | md2    |
| <b>RMSD (nm)</b>               | 0.26                                   | 0.28   | A            | 0.33             | 0.28   | 0.22            | 0.22   |
|                                |                                        |        | B            | 0.20             | 0.23   | 0.25            | 0.22   |
|                                |                                        |        | C            | 0.21             | 0.22   | 0.27            | 0.25   |
| <b>SASA (nm<sup>2</sup>/N)</b> | 242.22                                 | 244.74 | A            | 248.18           | 247.08 | 244.27          | 249.16 |
|                                |                                        |        | B            | 247.09           | 248.14 | 244.93          | 240.87 |
|                                |                                        |        | C            | 242.69           | 242.15 | 240.43          | 246.53 |
| <b>RG (nm)</b>                 | 2.45                                   | 2.43   | A            | 2.43             | 2.44   | 2.44            | 2.45   |
|                                |                                        |        | B            | 2.45             | 2.45   | 2.44            | 2.44   |
|                                |                                        |        | C            | 2.45             | 2.45   | 2.44            | 2.45   |

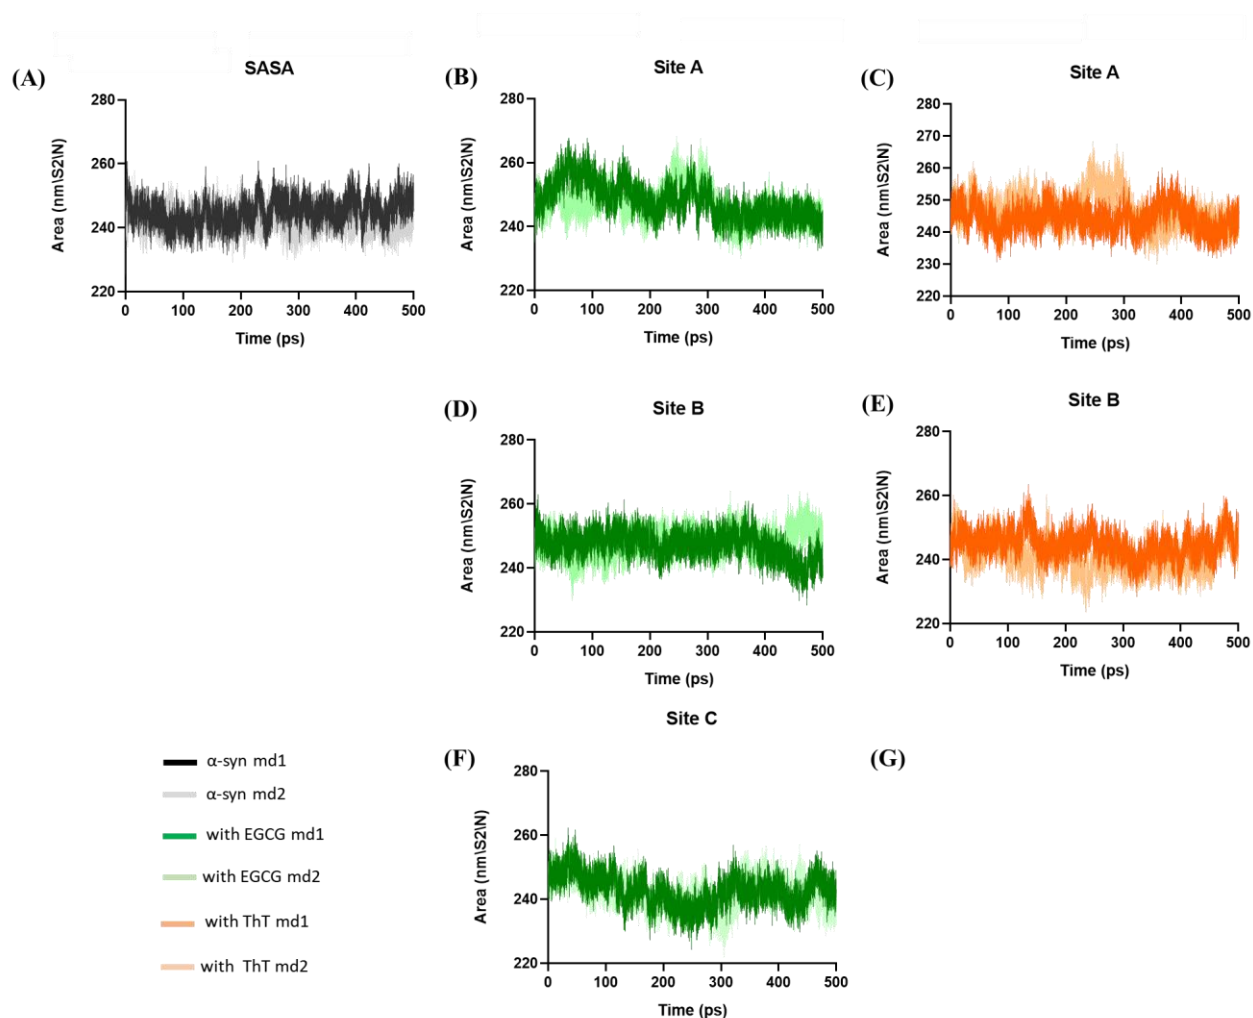

Figure S4. SASA values of  $\alpha$ -syn hydrophobic core in the absence of any ligand (black and light gray) and presence of oxidized EGCG (dark and light green) or ThT (dark and light orange) in two independent MD simulations.

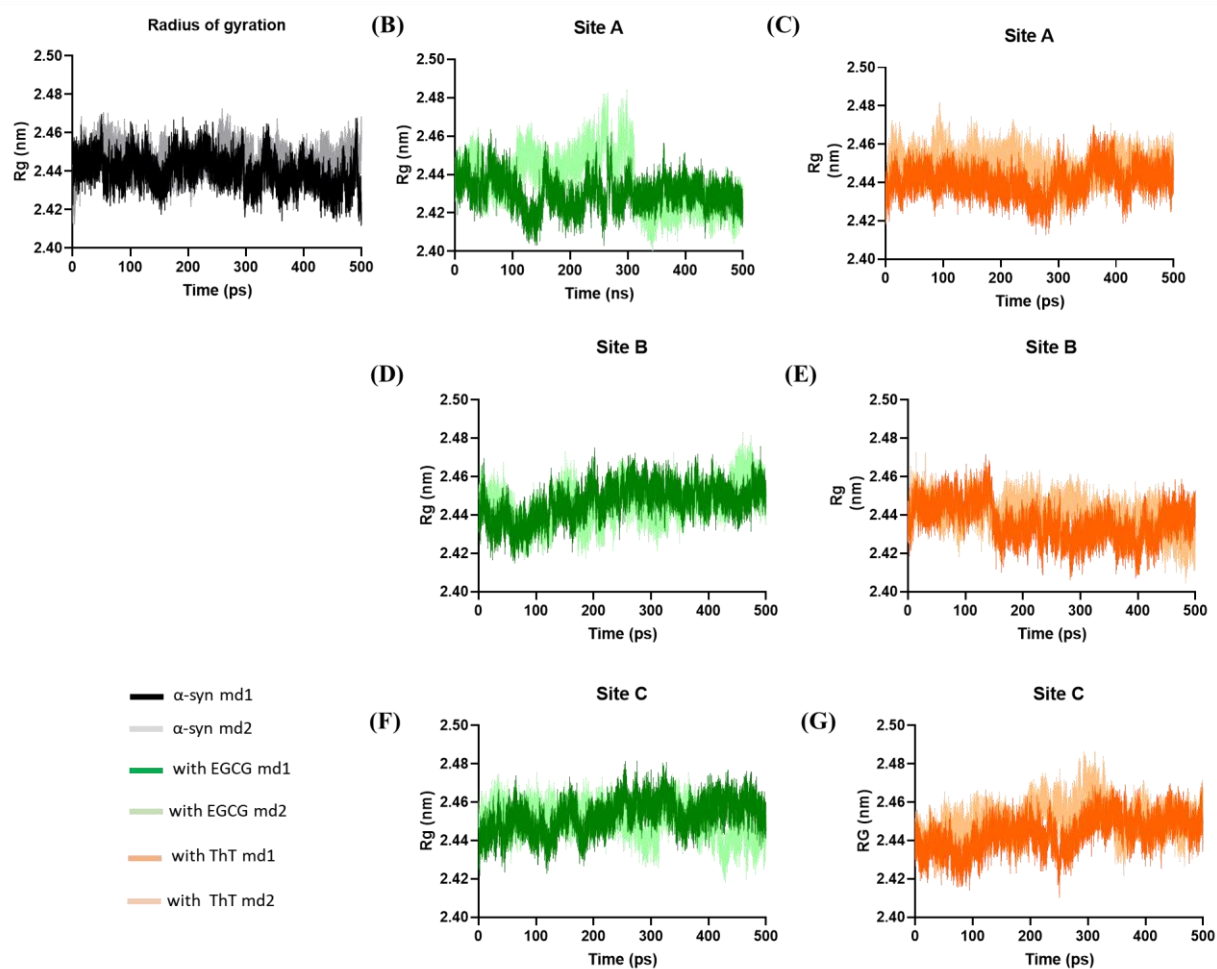

Figure S5. Rg values of  $\alpha$ -syn hydrophobic core in the absence of any ligand (black and light gray) and presence of oxidized EGCG (dark and light green) or ThT (dark and light orange) in two independent MD simulations.

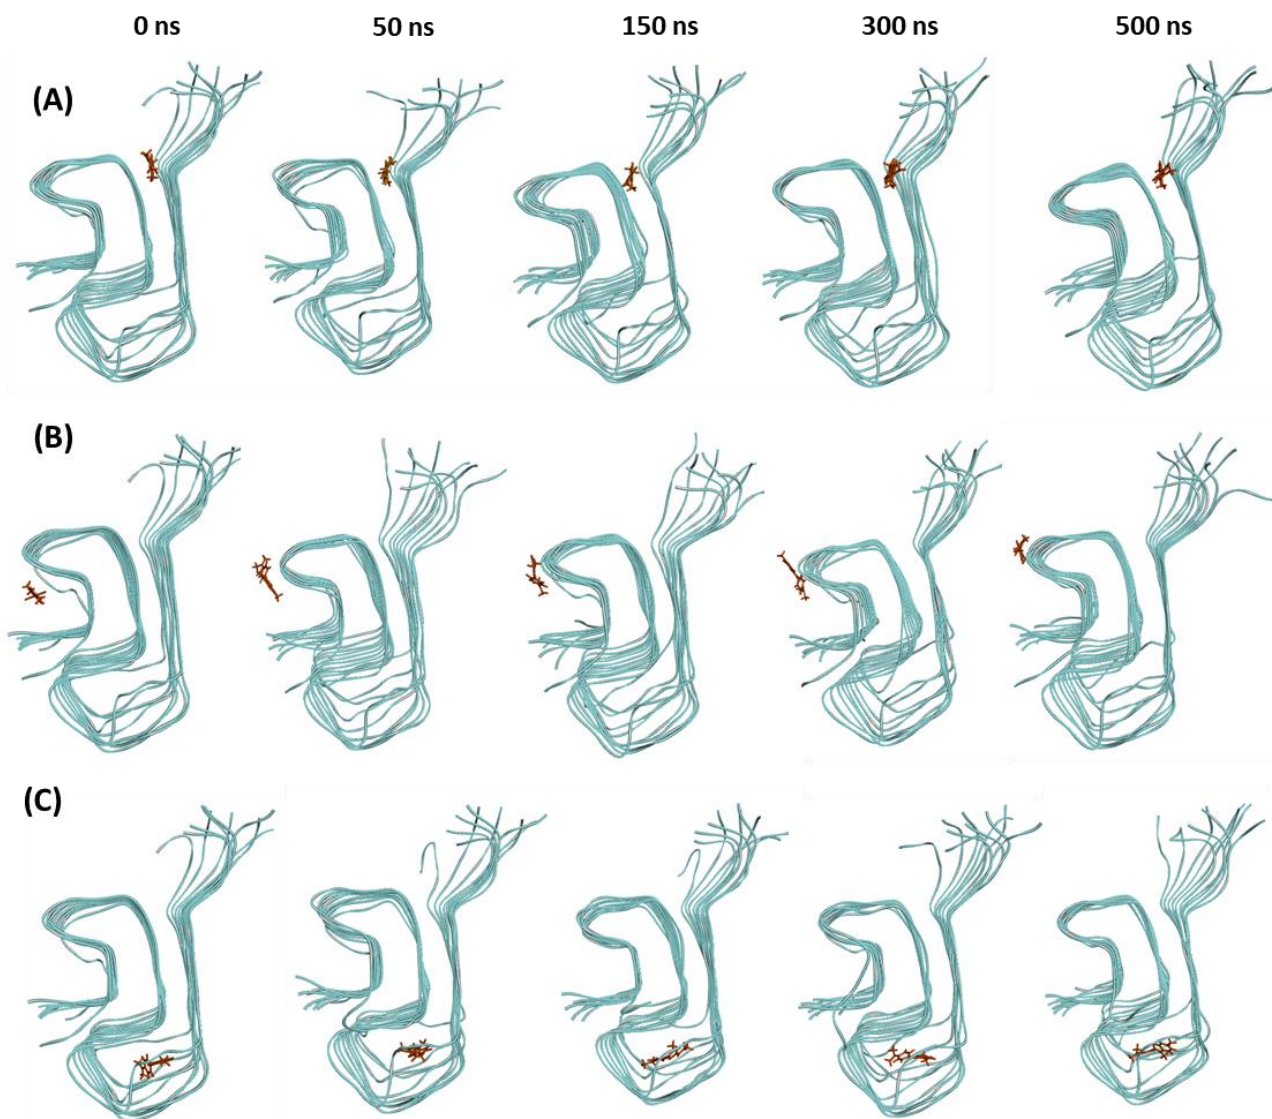

Figure S6. Representative snapshots of  $\alpha$ -syn hydrophobic core in the presence of ThT docked in sites A (A), B (B), and C (C) at 0, 50, 150, 300, and 500 ns for run 1.  $\alpha$ -syn structure in cyan and ThT (as orange sticks).



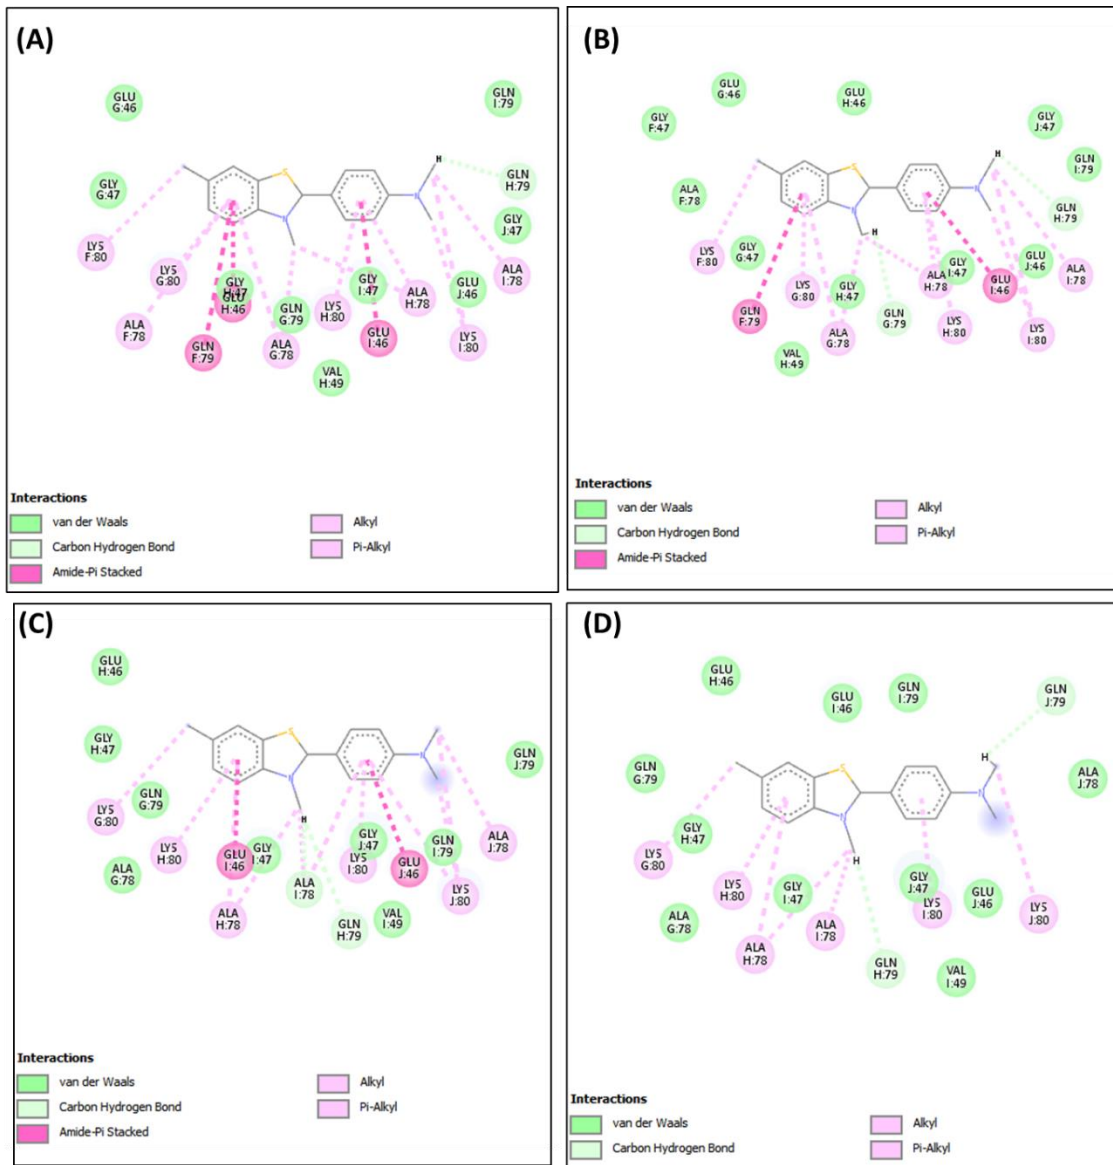

Figure S7. 2D ligand interaction diagrams for ThT docked in site A at 50 ns (A), 150 ns (B), 300 ns (C), and 500 ns (D) for run 1.

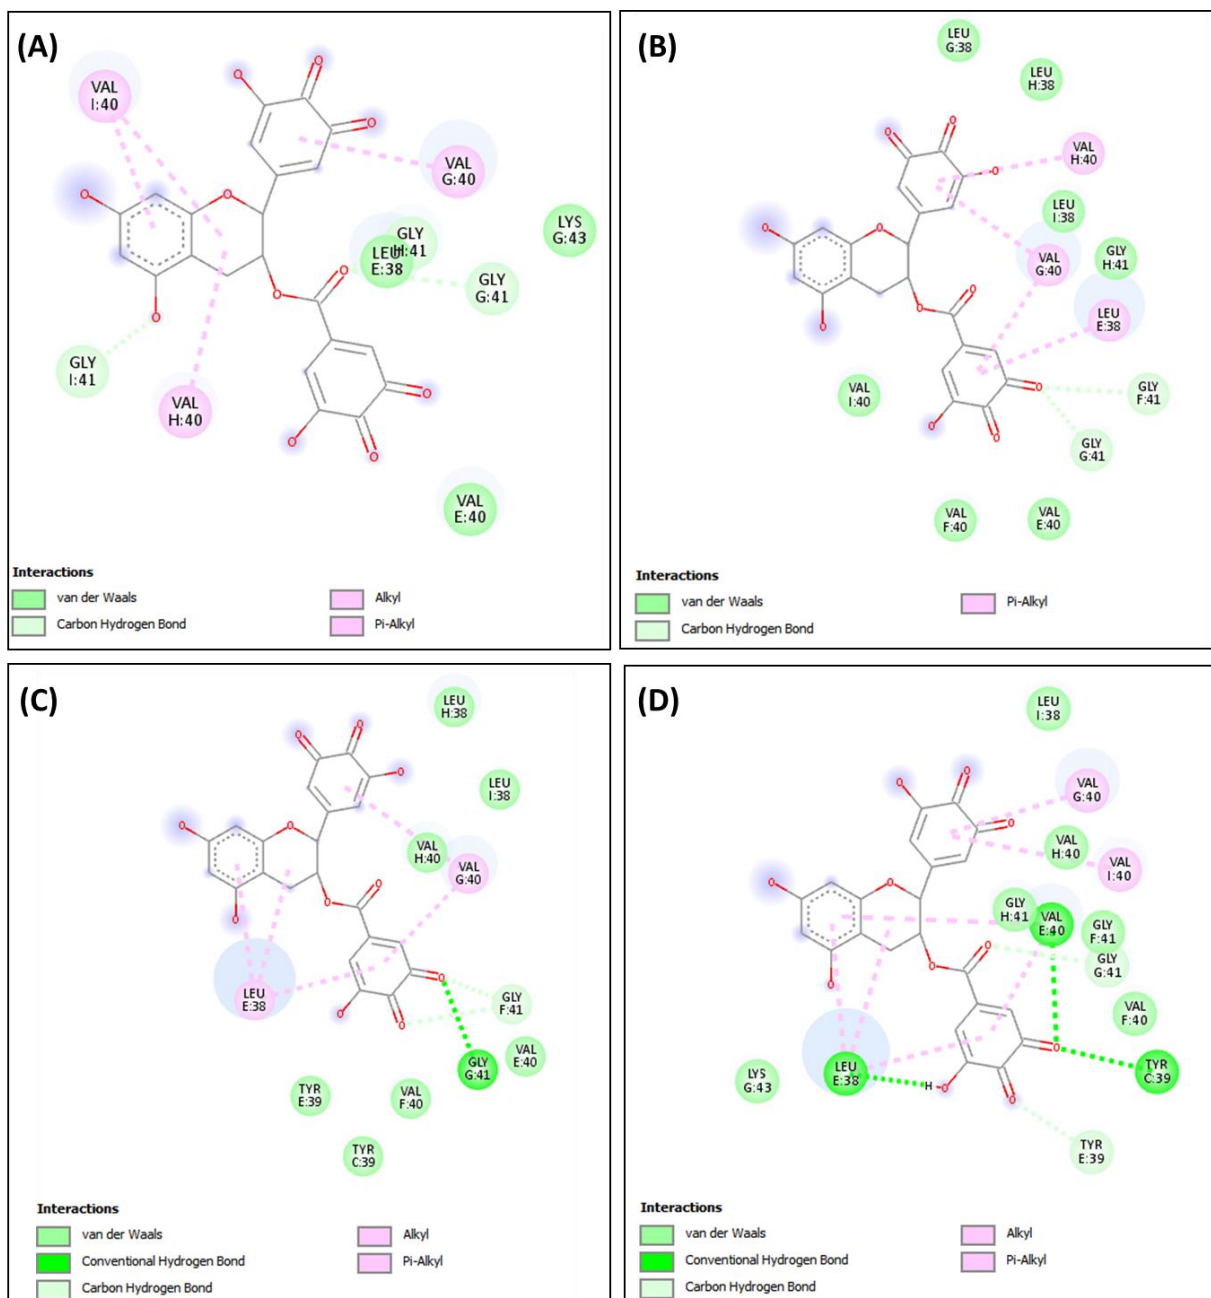

Figure S8. 2D ligand interaction diagrams for oxidized EGCG docked in site A at 50 ns (A), 150 ns (B), 300 ns (C), and 500 ns (D) for run 1.



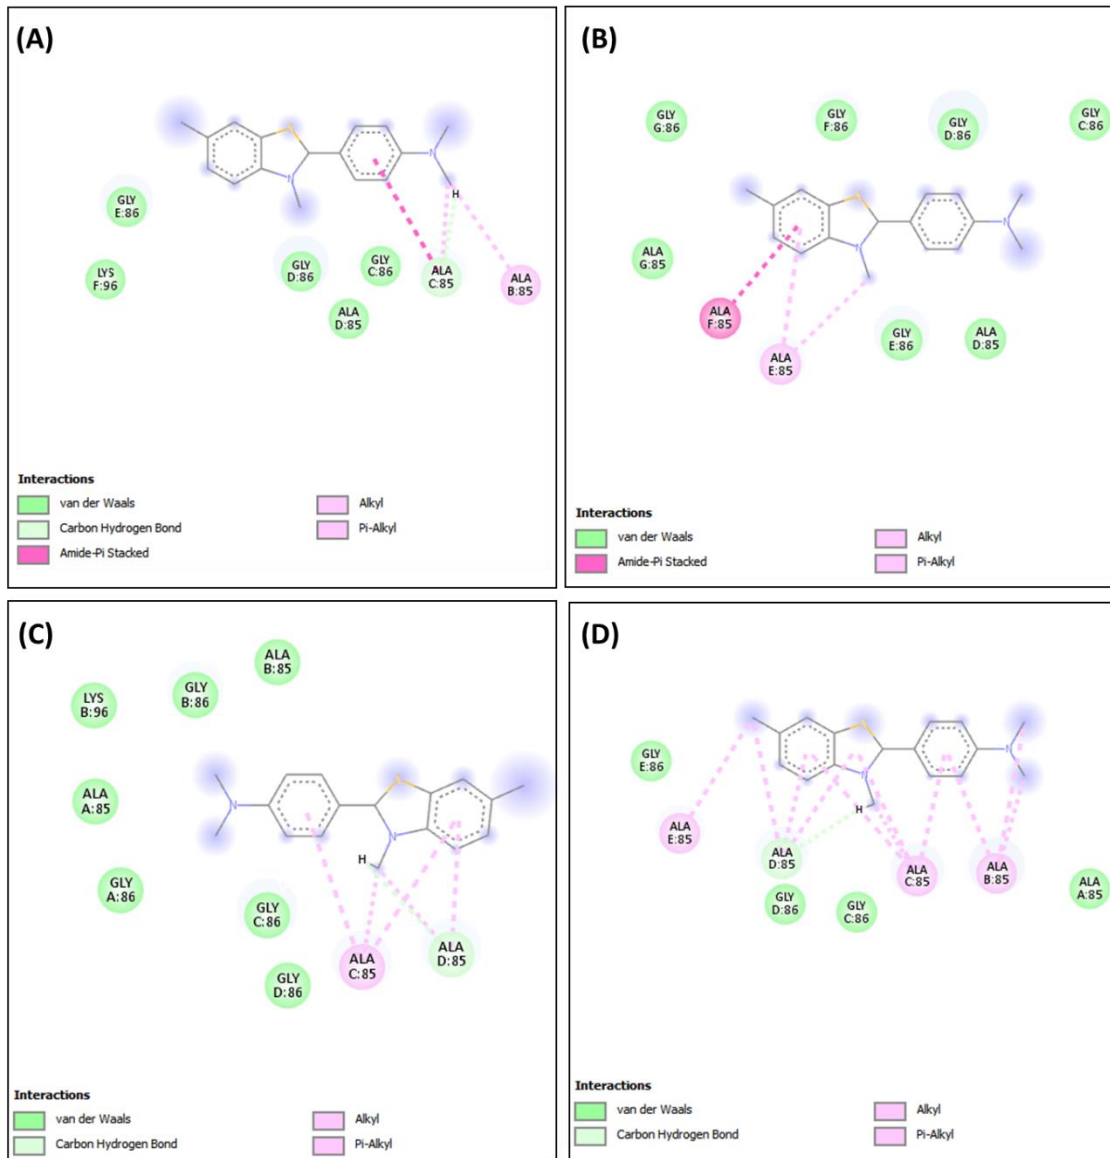

Figure S9. 2D ligand interaction diagrams for ThT docked in site B at 50 ns (A), 150 ns (B), 300 ns (C), and 500 ns (D) for run 1.

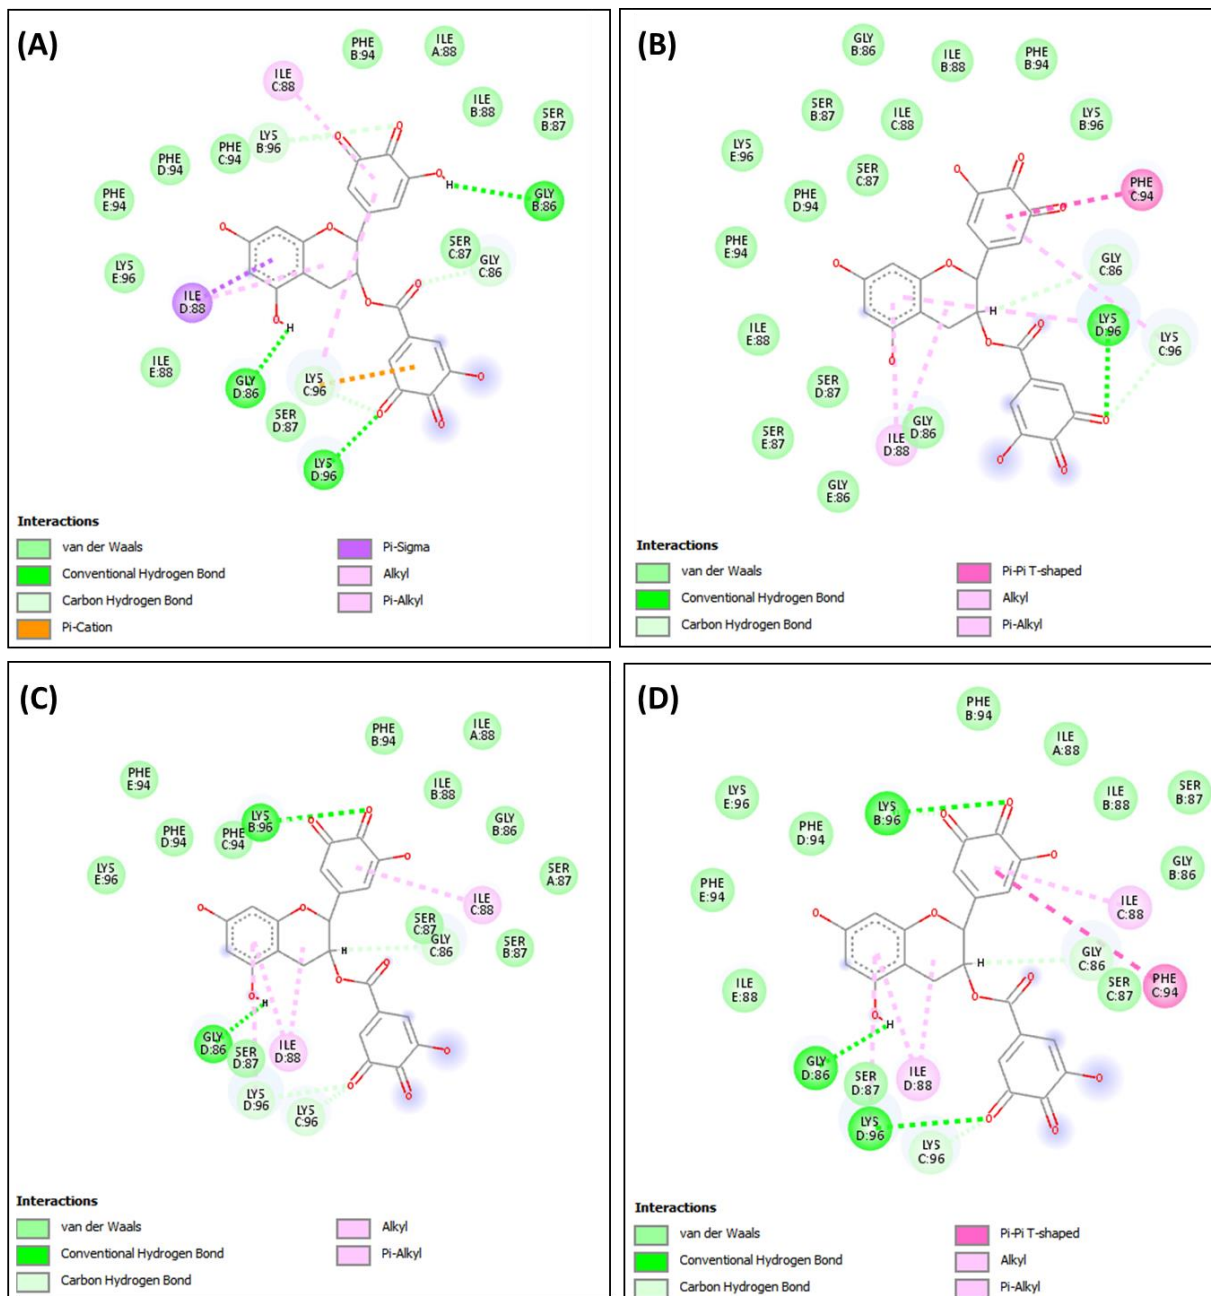

Figure S10. 2D ligand interaction diagrams for oxidized EGCG docked in site B at 50 ns (A), 150 ns (B), 300 ns (C), and 500 ns (D) for run 1.

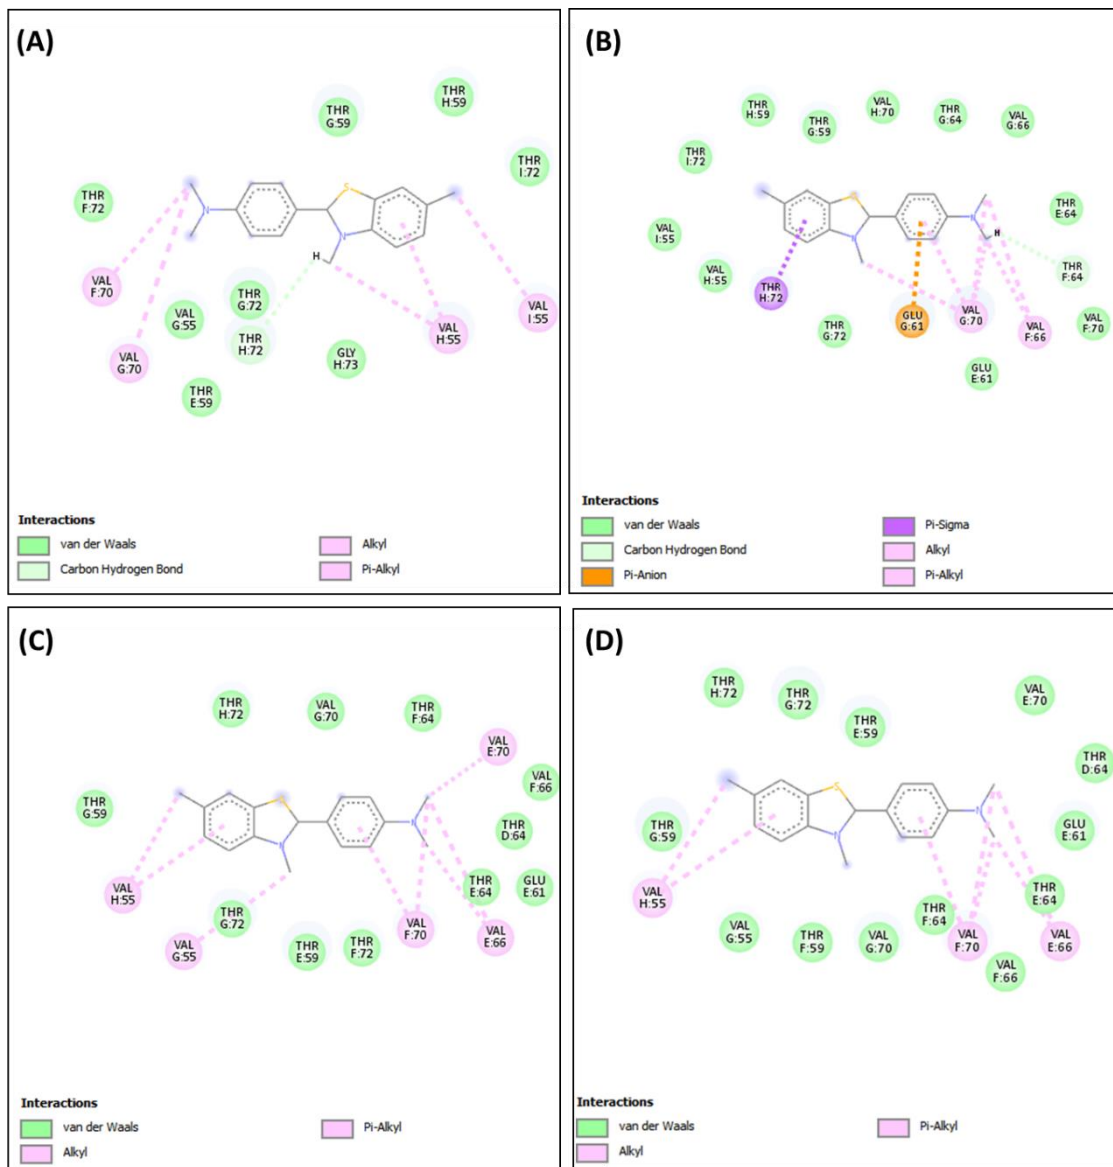

Figure S11. 2D ligand interaction diagrams for ThT docked in site C at 50 ns (A), 150 ns (B), 300 ns (C), and 500 ns (D) for run 1.

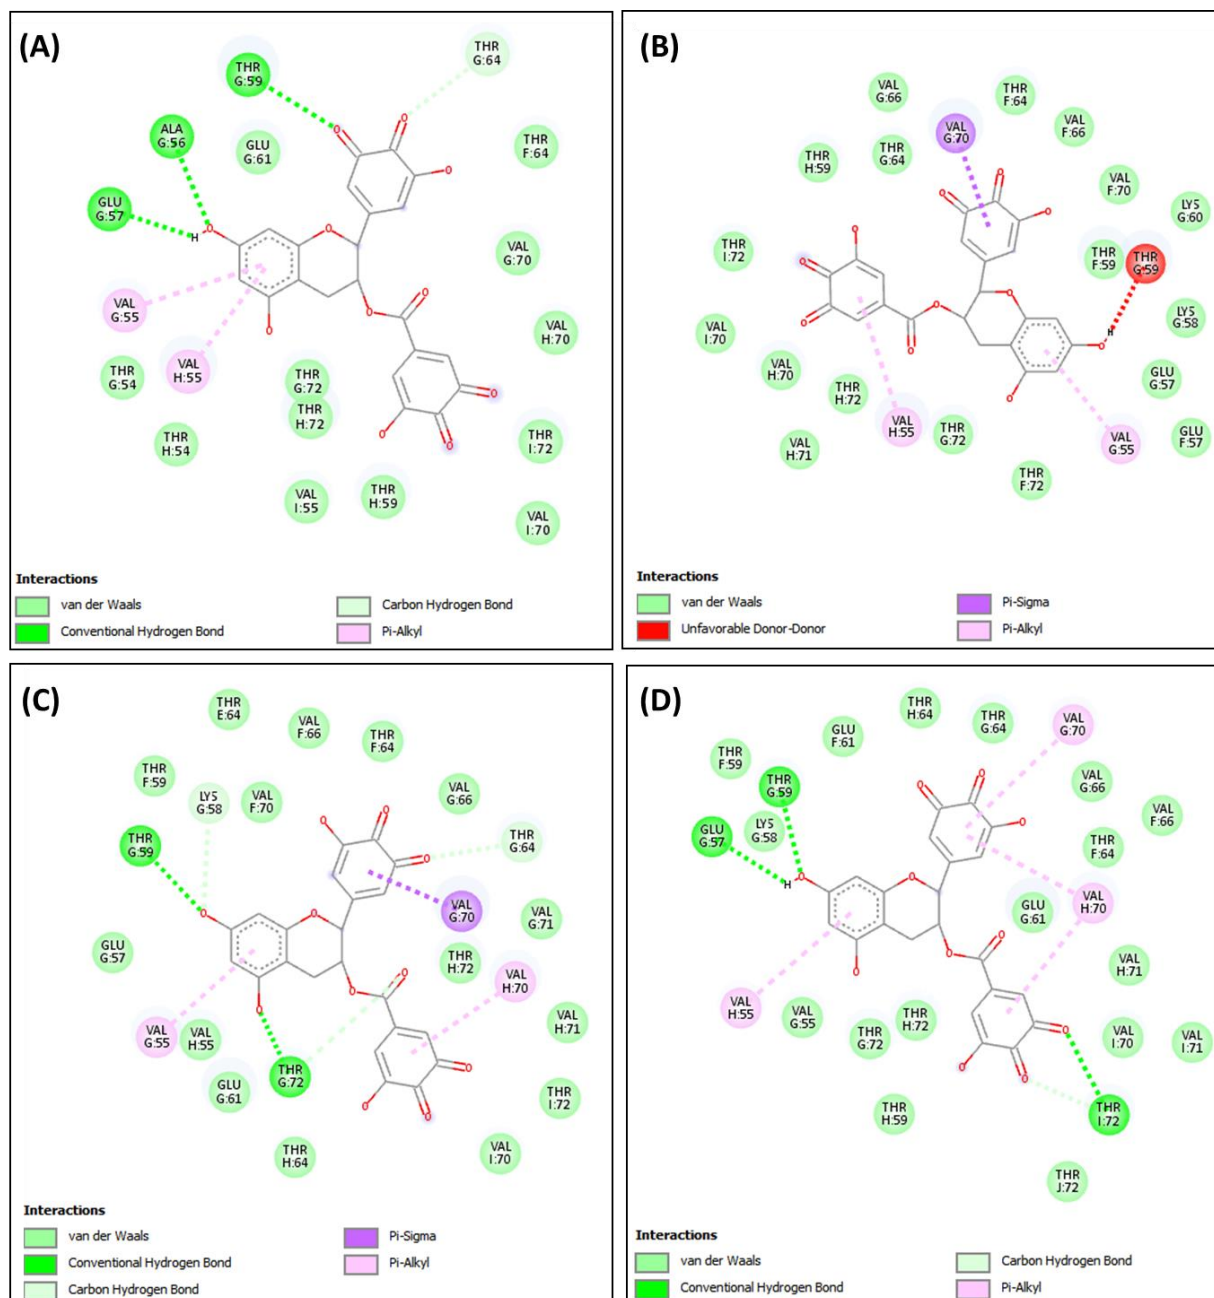

Figure S12. 2D ligand interaction diagrams for oxidized EGCG docked in site C at 50 ns (A), 150 ns (B), 300 ns (C), and 500 ns (D) for run 1.

Table S2. Distances between EGCG and specific residues over 500 ns simulation.

| Site | Residues | Chains | Groups                        | Distance (Å)* |       | Distance within 3.5 Å** |        |
|------|----------|--------|-------------------------------|---------------|-------|-------------------------|--------|
|      |          |        |                               | Md1           | Md2   | Md1                     | Md2    |
| A    | LEU38    | E      | =O                            | 3.52          | 7.21  | 65.83%                  | 2.89%  |
|      | TYR39    | C      | -OH                           | 3.41          | 10.59 | 74.32%                  | 0%     |
|      | VAL40    | G      | Alkyl                         | 2.89          | 8.77  | 93.22%                  | 1.22%  |
|      | GLY41    | G      | =O                            | 4.72          | 8.19  | 8.65%                   | 0%     |
|      | GLU46    | G      | COO <sup>-</sup>              | 16.4          | 7.37  | 0.03%                   | 0.65%  |
|      | LYS80    | G      | -NH <sub>3</sub> <sup>+</sup> | 19.5          | 6.31  | 0.04%                   | 2%     |
| B    | GLY86    | B      | =O                            | 3.18          | 5.94  | 86.04%                  | 0.22%  |
|      |          | C      | =O                            | 2.45          | 3.1   | 99.87%                  | 86.34% |
|      |          | D      | =O                            | 1.91          | 2.48  | 99.94%                  | 99.99% |
|      | SER87    | B      | =O                            | 3.97          | 5.84  | 17.66%                  | 0.05%  |
|      |          | C      | =O                            | 3.84          | 4.03  | 29.15%                  | 17.49% |
|      | D        |        | =O                            | 4.73          | 3.86  | 0.31%                   | 25.93% |
|      | ILE88    | B      | Alkyl                         | 4.11          | 8.90  | 49.20%                  | 0.03%  |
|      |          | C      | Alkyl                         | 2.82          | 2.83  | 97.98%                  | 95.63% |
|      |          | D      | Alkyl                         | 2.88          | 2.77  | 97.48%                  | 98.24% |
|      | PHE94    | B      | Aromatic ring                 | 2.83          | 5.04  | 97.46%                  | 0.76%  |
|      |          | C      | Aromatic ring                 | 2.5           | 2.82  | 99.95%                  | 97.62% |
|      |          | D      | Aromatic ring                 | 2.46          | 2.62  | 99.99%                  | 99.62% |
|      | LYS96    | B      | -NH <sub>3</sub> <sup>+</sup> | 3.4           | 8.46  | 59.32%                  | 3.71%  |
|      |          | C      | -NH <sub>3</sub> <sup>+</sup> | 3.8           | 3.45  | 33.79%                  | 60.76% |
|      |          | D      | -NH <sub>3</sub> <sup>+</sup> | 3.7           | 3.82  | 49.89%                  | 40.84% |
| C    | VAL55    | G      | alkyl                         | 2.64          | 2.91  | 99.68%                  | 93.71% |
|      |          | H      | alkyl                         | 3.18          | 4.42  | 73.72%                  | 23.16% |
|      | GLU57    | G      | =O                            | 2.86          | 3.72  | 95.20%                  | 41.60% |
|      | LYS58    | G      | -NH <sub>3</sub> <sup>+</sup> | 6.43          | 6.29  | 0.18%                   | 0%     |
|      | THR59    | G      | -OH                           | 3.33          | 3.95  | 67.72%                  | 26.92% |
|      | GLU61    | G      | =O                            | 7.5           | 7.06  | 0.73%                   | 0.5%   |
|      | THR64    | G      | -OH                           | 6.06          | 4.72  | 15.48%                  | 3.08%  |
|      | VAL70    | G      | alkyl                         | 3.24          | 2.91  | 70.93%                  | 93.71% |
|      |          | H      | alkyl                         | 5.82          | 2.87  | 12.04%                  | 94.08% |
|      | THR72    | G      | -OH                           | 3.04          | 3.89  | 90.98%                  | 15.86% |

\*The average distance over 500 ns. \*\* % Frames with distance between EGCG and specific residues within 0.35 Å.

Table S3. Distances between ThT and specific residues over 500 ns simulation.

| Site  | Residues | Chains                        | Groups                        | Distance (Å)* |        | Distance within 0.35 Å** |        |
|-------|----------|-------------------------------|-------------------------------|---------------|--------|--------------------------|--------|
|       |          |                               |                               | Md1           | Md2    | Md1                      | Md2    |
| A     | GLU46    | G                             | COO <sup>-</sup>              | 6.52          | 5.15   | 17.8%                    | 46.88% |
|       | GLU46    | H                             | COO <sup>-</sup>              | 4.05          | 3.6    | 48.60%                   | 68.96% |
|       | GLU46    | I                             | COO <sup>-</sup>              | 3.28          | 3.41   | 63.45%                   | 62.12% |
|       | GLU46    | J                             | COO <sup>-</sup>              | 3.80          | 3.87   | 36.00%                   | 36.94% |
|       | GLY47    | H                             | CH <sub>2</sub>               | 3.5           | 2.99   | 54.23%                   | 82.36% |
|       | GLY47    | I                             | CH <sub>2</sub>               | 2.49          | 2.48   | 83.39%                   | 62.83% |
|       | GLY47    | J                             | CH <sub>2</sub>               | 2.52          | 2.45   | 78.89%                   | 99.97% |
|       | GLN79    | G                             | C=O                           | 3.16          | 3.01   | 68.57%                   | 88.44% |
|       | GLN79    | H                             | C=O                           | 2.80          | 2.75   | 83.50%                   | 99.69% |
|       | GLN79    | I                             | C=O                           | 2.98          | 2.95   | 78.61%                   | 94.76% |
|       | GLN79    | J                             | C=O                           | 5.3           | 5.02   | 19.38%                   | 46.39% |
|       | LYS80    | G                             | -NH <sub>3</sub> <sup>+</sup> | 4.79          | 4.23   | 14.34%                   | 28.42% |
|       | LYS80    | H                             | -NH <sub>3</sub> <sup>+</sup> | 4.12          | 4.04   | 21.00%                   | 22.56% |
|       | LYS80    | I                             | -NH <sub>3</sub> <sup>+</sup> | 4.44          | 4.29   | 12.04%                   | 16.97% |
| LYS80 | J        | -NH <sub>3</sub> <sup>+</sup> | 5.22                          | 5.94          | 18.95% | 8.32%                    |        |
| B     | ALA85    | A                             | alkyl                         | 28.7          | 3.78   | 1.02%                    | 40.70% |
|       | ALA85    | B                             | alkyl                         | 27.9          | 37.6   | 1.32%                    | 0.49%  |
|       | ALA85    | C                             | alkyl                         | 27.4          | 37.3   | 1.99%                    | 0.66%  |
| B     | ALA85    | D                             | alkyl                         | 27.4          | 37.1   | 3.73%                    | 0.87%  |
|       | GLY86    | A                             | =O                            | 31.6          | 38.7   | 0.11%                    | 0.09%  |
|       |          | B                             | =O                            | 30.7          | 38.4   | 0.12%                    | 0.17%  |
|       |          | C                             | =O                            | 38.1          | 38.1   | 0.22%                    | 0.22%  |
| D     |          | =O                            | 29.8                          | 1.33          | 37.9   | 0.35%                    |        |
| C     | VAL55    | G                             | alkyl                         | 5.50          | 3.05   | 17.07%                   | 80.90% |
|       |          | H                             | alkyl                         | 6.07          | 5.83   | 20.67%                   | 6.03%  |
|       | THR59    | E                             | -OH                           | 3.02          | 4.84   | 84.66%                   | 2.63%  |
|       |          | G                             | -OH                           | 4.85          | 6.07   | 5.38%                    | 9.54%  |
|       | THR64    | E                             | -OH                           | 4.76          | 6.75   | 2.67%                    | 0.29%  |
|       |          | G                             | -OH                           | 4.03          | 6.47   | 46.66%                   | 32.71% |
| D     | VAL66    | E                             | alkyl                         | 2.90          | 6.20   | 86.61%                   | 2.90%  |
|       |          | F                             | alkyl                         | 3.24          | 5.49   | 73.82%                   | 25.07% |
|       |          | G                             | alkyl                         | 4.55          | 6.29   | 18.59%                   | 32.20% |
|       | VAL70    | E                             | alkyl                         | 3.35          | 4.19   | 68.12%                   | 45.47% |
|       |          | F                             | alkyl                         | 2.86          | 3.19   | 95.12%                   | 68.91% |
|       | THR72    | F                             | -OH                           | 4.52          | 3.34   | 17.15%                   | 66.32% |
|       |          | G                             | -OH                           | 4.69          | 4.57   | 30.42%                   | 12.89% |
|       |          | H                             | -OH                           | 4.85          | 6.60   | 31.53%                   | 4.97%  |

\*The average distance over 500 ns. \*\* % Frames with distance between EGCG and specific residues within 0.35 Å



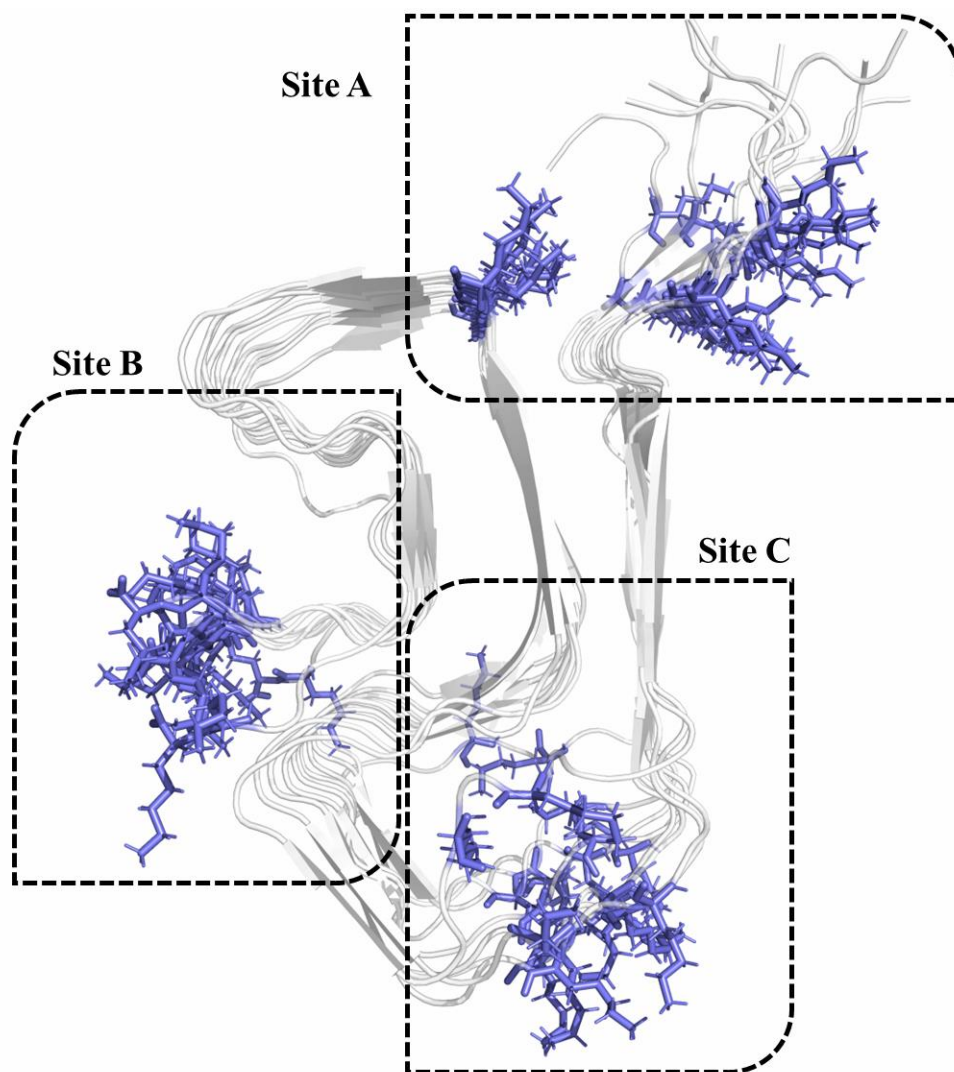

Figure S13. Three Lys-rich sites were selected for docking search, named as site A, B, and C. The Lys residues are shown in blue sticks.
